# Supplementary material for: The Electronic Structure of Graphene Nanoislands: A CAS-SCF and NEVPT2 Study
Source: Hindawi journal article supplement (doi:10.1155/2018/9097045), 2018-01-01
Supplement: f1 [file 9097045.f1.pdf]

## Supplementary Materials

In the following tables are reported the C=C and C-H interatomic distances in the different graphene nano-islands. For the hexagonal nano-islands, the central hexagon is measured as well as the six apical hexagons. For the rhombuses and triangles, one to three central hexagons are considered depending on the symmetry due to the number of hexagons on one side. We also report the interatomic distances in the four and three apical hexagons respectively. For all the geometry, the angles associated with the measured distances are listed. All the distances are given in angstrom and the angles in degree.

Table 1: C=C and C-H distances, and angles in hexagonal nano-islands

|                 |          |         |         |         |         |         |         |
|-----------------|----------|---------|---------|---------|---------|---------|---------|
|                 | n        | 2       |         |         |         |         |         |
| Central hexagon | C=C      | 1.4374  |         |         |         |         |         |
|                 | C=C      | 1.4374  |         |         |         |         |         |
|                 | C=C      | 1.4374  |         |         |         |         |         |
|                 | C=C      | 1.4374  |         |         |         |         |         |
|                 | C=C      | 1.4374  |         |         |         |         |         |
|                 | $\alpha$ | 1.4374  |         |         |         |         |         |
|                 | $\alpha$ | 120     |         |         |         |         |         |
|                 | $\alpha$ | 120     |         |         |         |         |         |
|                 | $\alpha$ | 120     |         |         |         |         |         |
|                 | $\alpha$ | 120     |         |         |         |         |         |
|                 | $\alpha$ | 120     |         |         |         |         |         |
|                 | $\alpha$ | 120     |         |         |         |         |         |
| Apical hexagons | C=C      | 1.34876 | 1.34876 | 1.34876 | 1.34876 | 1.34876 | 1.34876 |
|                 | C=C      | 1.43659 | 1.43659 | 1.43659 | 1.43659 | 1.43659 | 1.43659 |
|                 | C=C      | 1.39494 | 1.39494 | 1.39494 | 1.39494 | 1.39494 | 1.39494 |
|                 | C=C      | 1.4374  | 1.4374  | 1.4374  | 1.4374  | 1.4374  | 1.4374  |
|                 | C=C      | 1.39494 | 1.39494 | 1.39494 | 1.39494 | 1.39494 | 1.39494 |
|                 | C=C      | 1.43659 | 1.43659 | 1.43659 | 1.43659 | 1.43659 | 1.43659 |
|                 | $\alpha$ | 121.088 | 121.088 | 121.088 | 121.088 | 121.088 | 121.088 |
|                 | $\alpha$ | 121.088 | 121.088 | 121.088 | 121.088 | 121.088 | 121.088 |
|                 | $\alpha$ | 118.912 | 118.912 | 118.912 | 118.912 | 118.912 | 118.912 |
|                 | $\alpha$ | 120     | 120     | 120     | 120     | 120     | 120     |
|                 | $\alpha$ | 120     | 120     | 120     | 120     | 120     | 120     |
|                 | $\alpha$ | 118.912 | 118.912 | 118.912 | 118.912 | 118.912 | 118.912 |
|                 | C-H      | 1.08277 | 1.08277 | 1.08277 | 1.08277 | 1.08277 | 1.08277 |
|                 | C-H      | 1.08277 | 1.08277 | 1.08277 | 1.08277 | 1.08277 | 1.08277 |
|                 | $\beta$  | 120.571 | 120.571 | 120.571 | 120.571 | 120.571 | 120.571 |
|                 | $\beta$  | 118.341 | 118.341 | 118.341 | 118.341 | 118.341 | 118.341 |
|                 | n        | 3       |         |         |         |         |         |
| Central hexagon | C=C      | 1.40897 |         |         |         |         |         |
|                 | C=C      | 1.40897 |         |         |         |         |         |
|                 | C=C      | 1.40897 |         |         |         |         |         |
|                 | C=C      | 1.40897 |         |         |         |         |         |
|                 | C=C      | 1.40897 |         |         |         |         |         |
|                 | $\alpha$ | 1.40897 |         |         |         |         |         |
|                 | $\alpha$ | 120     |         |         |         |         |         |
|                 | $\alpha$ | 120     |         |         |         |         |         |
|                 | $\alpha$ | 120     |         |         |         |         |         |
|                 | $\alpha$ | 120     |         |         |         |         |         |
|                 | $\alpha$ | 120     |         |         |         |         |         |
|                 | $\alpha$ | 120     |         |         |         |         |         |
| Apical hexagons | C=C      | 1.33465 | 1.33465 | 1.33465 | 1.33465 | 1.33465 | 1.33465 |
|                 | C=C      | 1.4611  | 1.4611  | 1.4611  | 1.4611  | 1.4611  | 1.4611  |
|                 | C=C      | 1.4153  | 1.4153  | 1.4153  | 1.4153  | 1.4153  | 1.4153  |
|                 | C=C      | 1.4446  | 1.4446  | 1.4446  | 1.4446  | 1.4446  | 1.4446  |
|                 | C=C      | 1.4153  | 1.4153  | 1.4153  | 1.4153  | 1.4153  | 1.4153  |
|                 | C=C      | 1.4611  | 1.4611  | 1.4611  | 1.4611  | 1.4611  | 1.4611  |
|                 | $\alpha$ | 121.65  | 121.65  | 121.65  | 121.65  | 121.65  | 121.65  |
|                 | $\alpha$ | 121.65  | 121.65  | 121.65  | 121.65  | 121.65  | 121.65  |
|                 | $\alpha$ | 118.157 | 118.157 | 118.157 | 118.157 | 118.157 | 118.157 |
|                 | $\alpha$ | 120.193 | 120.193 | 120.193 | 120.193 | 120.193 | 120.193 |
|                 | $\alpha$ | 120.193 | 120.193 | 120.193 | 120.193 | 120.193 | 120.193 |
|                 | $\alpha$ | 118.157 | 118.157 | 118.157 | 118.157 | 118.157 | 118.157 |
|                 | C-H      | 1.08291 | 1.08291 | 1.08291 | 1.08291 | 1.08291 | 1.08291 |
|                 | C-H      | 1.08291 | 1.08291 | 1.08291 | 1.08291 | 1.08291 | 1.08291 |
|                 | $\beta$  | 120.725 | 120.725 | 120.725 | 120.725 | 120.725 | 120.725 |
|                 | $\beta$  | 117.625 | 117.625 | 117.625 | 117.625 | 117.625 | 117.625 |

Table 2: C=C and C-H distances, and angles in hexagonal nano-islands - Part 2

|                 |          |         |         |         |         |         |         |
|-----------------|----------|---------|---------|---------|---------|---------|---------|
|                 | n        | 4       |         |         |         |         |         |
| Central hexagon | C=C      | 1.4592  |         |         |         |         |         |
|                 | C=C      | 1.41554 |         |         |         |         |         |
|                 | C=C      | 1.41554 |         |         |         |         |         |
|                 | C=C      | 1.4592  |         |         |         |         |         |
|                 | C=C      | 1.41554 |         |         |         |         |         |
|                 | $\alpha$ | 1.41554 |         |         |         |         |         |
|                 | $\alpha$ | 119.955 |         |         |         |         |         |
|                 | $\alpha$ | 119.955 |         |         |         |         |         |
|                 | $\alpha$ | 120.089 |         |         |         |         |         |
|                 | $\alpha$ | 119.955 |         |         |         |         |         |
|                 | $\alpha$ | 119.955 |         |         |         |         |         |
|                 | $\alpha$ | 120.089 |         |         |         |         |         |
| Apical hexagons | C=C      | 1.3707  | 1.32909 | 1.32909 | 1.3707  | 1.32909 | 1.32909 |
|                 | C=C      | 1.417   | 1.46689 | 1.47415 | 1.417   | 1.46689 | 1.47415 |
|                 | C=C      | 1.41118 | 1.44419 | 1.44872 | 1.41118 | 1.44419 | 1.44872 |
|                 | C=C      | 1.42566 | 1.40805 | 1.40805 | 1.42566 | 1.40805 | 1.40805 |
|                 | C=C      | 1.41118 | 1.44872 | 1.44419 | 1.41118 | 1.44872 | 1.44419 |
|                 | C=C      | 1.417   | 1.47415 | 1.46689 | 1.417   | 1.47415 | 1.46689 |
|                 | $\alpha$ | 121.412 | 122.06  | 122.172 | 121.412 | 122.06  | 122.172 |
|                 | $\alpha$ | 121.412 | 122.172 | 122.06  | 121.412 | 122.172 | 122.06  |
|                 | $\alpha$ | 118.331 | 117.18  | 116.835 | 118.331 | 117.18  | 116.835 |
|                 | $\alpha$ | 120.256 | 120.878 | 120.875 | 120.256 | 120.878 | 120.875 |
|                 | $\alpha$ | 120.256 | 120.875 | 120.878 | 120.256 | 120.875 | 120.878 |
|                 | $\alpha$ | 118.331 | 116.835 | 117.18  | 118.331 | 116.835 | 117.18  |
|                 | C-H      | 1.08335 | 1.08239 | 1.08349 | 1.08335 | 1.08239 | 1.08349 |
|                 | C-H      | 1.08335 | 1.08349 | 1.08239 | 1.08335 | 1.08349 | 1.08239 |
|                 | $\beta$  | 119.836 | 120.806 | 120.538 | 119.836 | 120.806 | 120.538 |
|                 | $\beta$  | 118.751 | 117.29  | 117.133 | 118.751 | 117.29  | 117.133 |
|                 | n        | 5       |         |         |         |         |         |
| Central hexagon | C=C      | 1.41169 |         |         |         |         |         |
|                 | C=C      | 1.41169 |         |         |         |         |         |
|                 | C=C      | 1.41169 |         |         |         |         |         |
|                 | C=C      | 1.41169 |         |         |         |         |         |
|                 | C=C      | 1.41169 |         |         |         |         |         |
|                 | $\alpha$ | 1.41169 |         |         |         |         |         |
|                 | $\alpha$ | 120     |         |         |         |         |         |
|                 | $\alpha$ | 120     |         |         |         |         |         |
|                 | $\alpha$ | 120     |         |         |         |         |         |
|                 | $\alpha$ | 120     |         |         |         |         |         |
|                 | $\alpha$ | 120     |         |         |         |         |         |
|                 | $\alpha$ | 120     |         |         |         |         |         |
| Apical hexagons | C=C      | 1.32594 | 1.32594 | 1.32594 | 1.32594 | 1.32594 | 1.32594 |
|                 | C=C      | 1.47766 | 1.47766 | 1.47766 | 1.47766 | 1.47766 | 1.47766 |
|                 | C=C      | 1.45612 | 1.45612 | 1.45612 | 1.45612 | 1.45612 | 1.45612 |
|                 | C=C      | 1.41531 | 1.41531 | 1.41531 | 1.41531 | 1.41531 | 1.41531 |
|                 | C=C      | 1.45612 | 1.45612 | 1.45612 | 1.45612 | 1.45612 | 1.45612 |
|                 | C=C      | 1.47766 | 1.47766 | 1.47766 | 1.47766 | 1.47766 | 1.47766 |
|                 | $\alpha$ | 122.191 | 122.191 | 122.191 | 122.191 | 122.191 | 122.191 |
|                 | $\alpha$ | 122.191 | 122.191 | 122.191 | 122.191 | 122.191 | 122.191 |
|                 | $\alpha$ | 117.149 | 117.149 | 117.149 | 117.149 | 117.149 | 117.149 |
|                 | $\alpha$ | 120.66  | 120.66  | 120.66  | 120.66  | 120.66  | 120.66  |
|                 | $\alpha$ | 120.66  | 120.66  | 120.66  | 120.66  | 120.66  | 120.66  |
|                 | $\alpha$ | 117.149 | 117.149 | 117.149 | 117.149 | 117.149 | 117.149 |
|                 | C-H      | 1.08307 | 1.08307 | 1.08307 | 1.08307 | 1.08307 | 1.08307 |
|                 | C-H      | 1.08307 | 1.08307 | 1.08307 | 1.08307 | 1.08307 | 1.08307 |
|                 | $\beta$  | 120.761 | 120.761 | 120.761 | 120.761 | 120.761 | 120.761 |
|                 | $\beta$  | 117.048 | 117.048 | 117.048 | 117.048 | 117.048 | 117.048 |

Table 3: C=C and C-H distances, and angles in hexagonal nano-islands - Part 3

|                 | n        | 6       |         |         |         |         |         |
|-----------------|----------|---------|---------|---------|---------|---------|---------|
| Central hexagon | C=C      | 1.44322 |         |         |         |         |         |
|                 | C=C      | 1.44159 |         |         |         |         |         |
|                 | C=C      | 1.44159 |         |         |         |         |         |
|                 | C=C      | 1.44322 |         |         |         |         |         |
|                 | C=C      | 1.44159 |         |         |         |         |         |
|                 | $\alpha$ | 1.44159 |         |         |         |         |         |
|                 | $\alpha$ | 120.035 |         |         |         |         |         |
|                 | $\alpha$ | 120.035 |         |         |         |         |         |
|                 | $\alpha$ | 119.929 |         |         |         |         |         |
|                 | $\alpha$ | 120.035 |         |         |         |         |         |
|                 | $\alpha$ | 120.035 |         |         |         |         |         |
|                 | $\alpha$ | 119.929 |         |         |         |         |         |
| Apical hexagons | C=C      | 1.3318  | 1.33092 | 1.33092 | 1.3318  | 1.33092 | 1.33092 |
|                 | C=C      | 1.45921 | 1.47967 | 1.47599 | 1.45921 | 1.47967 | 1.47599 |
|                 | C=C      | 1.42537 | 1.42843 | 1.48701 | 1.42537 | 1.42843 | 1.48701 |
|                 | C=C      | 1.41741 | 1.40408 | 1.40408 | 1.41741 | 1.40408 | 1.40408 |
|                 | C=C      | 1.42537 | 1.48701 | 1.42843 | 1.42537 | 1.48701 | 1.42843 |
|                 | C=C      | 1.45921 | 1.47599 | 1.47967 | 1.45921 | 1.47599 | 1.47967 |
|                 | $\alpha$ | 122.646 | 122.971 | 123.786 | 122.646 | 122.971 | 123.786 |
|                 | $\alpha$ | 122.646 | 123.786 | 122.971 | 122.646 | 123.786 | 122.971 |
|                 | $\alpha$ | 115.873 | 116.664 | 112.235 | 115.873 | 116.664 | 112.235 |
|                 | $\alpha$ | 121.481 | 119.02  | 125.324 | 121.481 | 119.02  | 125.324 |
|                 | $\alpha$ | 121.481 | 125.324 | 119.02  | 121.481 | 125.324 | 119.02  |
|                 | $\alpha$ | 115.873 | 112.235 | 116.664 | 115.873 | 112.235 | 116.664 |
|                 | C-H      | 1.08364 | 1.08301 | 1.08395 | 1.08364 | 1.08301 | 1.08395 |
|                 | C-H      | 1.08364 | 1.08395 | 1.08301 | 1.08364 | 1.08395 | 1.08301 |
|                 | $\beta$  | 120.914 | 120.825 | 119.493 | 120.914 | 120.825 | 119.493 |
|                 | $\beta$  | 116.441 | 116.721 | 116.204 | 116.441 | 116.721 | 116.204 |

Table 4: C=C and C-H distances, and angles in rhombus nano-islands

|                  | n        | 2       |         |         |         | 4       |         |         |         |
|------------------|----------|---------|---------|---------|---------|---------|---------|---------|---------|
| Central hexagons | C=C      |         |         |         |         | 1.43849 |         | 1.39962 |         |
|                  | C=C      |         |         |         |         | 1.38935 |         | 1.43299 |         |
|                  | C=C      |         |         |         |         | 1.43849 |         | 1.39962 |         |
|                  | C=C      |         |         |         |         | 1.39962 |         | 1.43849 |         |
|                  | C=C      |         |         |         |         | 1.43299 |         | 1.38935 |         |
|                  | C=C      |         |         |         |         | 1.39962 |         | 1.43849 |         |
|                  | $\alpha$ |         |         |         |         | 120.002 |         | 120.002 |         |
|                  | $\alpha$ |         |         |         |         | 120.055 |         | 119.943 |         |
|                  | $\alpha$ |         |         |         |         | 120.055 |         | 119.943 |         |
|                  | $\alpha$ |         |         |         |         | 120.002 |         | 120.002 |         |
|                  | $\alpha$ |         |         |         |         | 119.943 |         | 120.055 |         |
|                  | $\alpha$ |         |         |         |         | 119.943 |         | 120.055 |         |
| Apical hexagons  | C=C      | 1.3853  | 1.46214 | 1.3853  | 1.46214 | 1.37864 | 1.47243 | 1.37864 | 1.47243 |
|                  | C=C      | 1.39453 | 1.33275 | 1.39453 | 1.33275 | 1.45968 | 1.32834 | 1.45968 | 1.32834 |
|                  | C=C      | 1.41302 | 1.46214 | 1.41302 | 1.46214 | 1.44154 | 1.47243 | 1.44154 | 1.47243 |
|                  | C=C      | 1.41302 | 1.41302 | 1.41302 | 1.41302 | 1.44154 | 1.43778 | 1.44154 | 1.43778 |
|                  | C=C      | 1.39453 | 1.44592 | 1.39453 | 1.44592 | 1.45968 | 1.43299 | 1.45968 | 1.43299 |
|                  | C=C      | 1.3853  | 1.41302 | 1.3853  | 1.41302 | 1.37864 | 1.43778 | 1.37864 | 1.43778 |
|                  | $\alpha$ | 120.531 | 118.511 | 120.531 | 118.511 | 121.501 | 117.669 | 121.501 | 117.669 |
|                  | $\alpha$ | 120.583 | 121.475 | 120.583 | 121.475 | 121.122 | 121.957 | 121.122 | 121.957 |
|                  | $\alpha$ | 119.167 | 121.475 | 119.167 | 121.475 | 117.97  | 121.957 | 117.97  | 121.957 |
|                  | $\alpha$ | 119.97  | 118.511 | 119.97  | 118.511 | 120.315 | 117.669 | 120.315 | 117.669 |
|                  | $\alpha$ | 119.167 | 120.015 | 119.167 | 120.015 | 117.97  | 120.374 | 117.97  | 120.374 |
|                  | $\alpha$ | 120.583 | 120.015 | 120.583 | 120.015 | 121.122 | 120.374 | 121.122 | 120.374 |
|                  | C-H      | 1.08267 | 1.08287 | 1.08267 | 1.08287 | 1.08295 | 1.083   | 1.08295 | 1.083   |
|                  | C-H      | 1.08254 | 1.08287 | 1.08254 | 1.08287 | 1.08227 | 1.083   | 1.08227 | 1.083   |
|                  | C-H      | 1.08254 |         | 1.08254 |         | 1.08227 |         | 1.08227 |         |
|                  | $\beta$  | 119.735 | 120.899 | 119.735 | 120.899 | 119.25  | 120.798 | 119.25  | 120.798 |
|                  | $\beta$  | 119.412 | 117.626 | 119.412 | 117.626 | 118.296 | 117.244 | 118.296 | 117.244 |
|                  | $\beta$  | 120.006 | -       | 120.006 |         | 120.582 |         | 120.582 |         |

Table 5: C=C and C-H distances, and angles in rhombus nano-islands - Part 2

|                  | n        | 5       |         |         |         | 6       |         |         |         |
|------------------|----------|---------|---------|---------|---------|---------|---------|---------|---------|
| Central hexagons | C=C      | 1.40965 |         |         |         | 1.41246 |         | 1.44194 |         |
|                  | C=C      | 1.40916 |         |         |         | 1.43576 |         | 1.39775 |         |
|                  | C=C      | 1.40965 |         |         |         | 1.41246 |         | 1.44194 |         |
|                  | C=C      | 1.40965 |         |         |         | 1.44194 |         | 1.41246 |         |
|                  | C=C      | 1.40916 |         |         |         | 1.39775 |         | 1.43576 |         |
|                  | C=C      | 1.40965 |         |         |         | 1.44194 |         | 1.41246 |         |
|                  | $\alpha$ | 119.848 |         |         |         | 119.798 |         | 119.798 |         |
|                  | $\alpha$ | 120.076 |         |         |         | 120.003 |         | 120.199 |         |
|                  | $\alpha$ | 120.076 |         |         |         | 120.003 |         | 120.199 |         |
|                  | $\alpha$ | 119.848 |         |         |         | 119.798 |         | 119.798 |         |
|                  | $\alpha$ | 120.076 |         |         |         | 120.199 |         | 120.003 |         |
|                  | $\alpha$ | 120.076 |         |         |         | 120.199 |         | 120.003 |         |
| Apical hexagons  | C=C      | 1.38363 | 1.46205 | 1.38363 | 1.46205 | 1.38357 | 1.47657 | 1.38357 | 1.47657 |
|                  | C=C      | 1.39847 | 1.33379 | 1.39847 | 1.33379 | 1.3985  | 1.32615 | 1.3985  | 1.32615 |
|                  | C=C      | 1.40844 | 1.46205 | 1.40844 | 1.46205 | 1.40845 | 1.47657 | 1.40845 | 1.47657 |
|                  | C=C      | 1.40844 | 1.41718 | 1.40844 | 1.41718 | 1.40845 | 1.45262 | 1.40845 | 1.45262 |
|                  | C=C      | 1.39847 | 1.4432  | 1.39847 | 1.4432  | 1.3985  | 1.4179  | 1.3985  | 1.4179  |
|                  | C=C      | 1.38363 | 1.41718 | 1.38363 | 1.41718 | 1.38357 | 1.45262 | 1.38357 | 1.45262 |
|                  | $\alpha$ | 120.097 | 118.181 | 120.097 | 118.181 | 120.081 | 117.32  | 120.081 | 117.32  |
|                  | $\alpha$ | 120.668 | 121.644 | 120.668 | 121.644 | 120.673 | 122.105 | 120.673 | 122.105 |
|                  | $\alpha$ | 119.561 | 121.644 | 119.561 | 121.644 | 119.582 | 122.105 | 119.582 | 122.105 |
|                  | $\alpha$ | 119.446 | 118.181 | 119.446 | 118.181 | 119.409 | 117.32  | 119.409 | 117.32  |
|                  | $\alpha$ | 119.561 | 120.175 | 119.561 | 120.175 | 119.582 | 120.574 | 119.582 | 120.574 |
|                  | $\alpha$ | 120.668 | 120.175 | 120.668 | 120.175 | 120.673 | 120.574 | 120.673 | 120.574 |
|                  | C-H      | 1.08264 | 1.0829  | 1.08264 | 1.0829  | 1.08264 | 1.08305 | 1.08264 | 1.08305 |
|                  | C-H      | 1.08228 | 1.0829  | 1.08228 | 1.0829  | 1.08228 | 1.08305 | 1.08228 | 1.08305 |
|                  | C-H      | 1.08228 |         | 1.08228 |         | 1.08228 |         | 1.08228 |         |
|                  | $\beta$  | 119.952 | 120.766 | 119.952 | 120.766 | 119.959 | 120.805 | 119.959 | 120.805 |
|                  | $\beta$  | 119.198 | 117.59  | 119.198 | 117.59  | 119.189 | 117.089 | 119.189 | 117.089 |
|                  | $\beta$  | 120.134 |         | 120.134 |         | 120.138 |         | 120.138 |         |

Table 6: C=C and C-H distances, and angles in rhombus nano-islands - Part 3

|                  | n        | 7       |         |         |         |
|------------------|----------|---------|---------|---------|---------|
| Central hexagons | C=C      | 1.43439 |         |         |         |
|                  | C=C      | 1.43215 |         |         |         |
|                  | C=C      | 1.43439 |         |         |         |
|                  | C=C      | 1.43439 |         |         |         |
|                  | C=C      | 1.43215 |         |         |         |
|                  | C=C      | 1.43439 |         |         |         |
|                  | $\alpha$ | 119.666 |         |         |         |
|                  | $\alpha$ | 120.167 |         |         |         |
|                  | $\alpha$ | 120.167 |         |         |         |
|                  | $\alpha$ | 119.666 |         |         |         |
|                  | $\alpha$ | 120.167 |         |         |         |
|                  | $\alpha$ | 120.167 |         |         |         |
| Apical hexagons  | C=C      | 1.37931 | 1.47014 | 1.37931 | 1.47014 |
|                  | C=C      | 1.44628 | 1.32848 | 1.44628 | 1.32848 |
|                  | C=C      | 1.43752 | 1.47014 | 1.43752 | 1.47014 |
|                  | C=C      | 1.43752 | 1.43381 | 1.43752 | 1.43381 |
|                  | C=C      | 1.44628 | 1.43632 | 1.44628 | 1.43632 |
|                  | C=C      | 1.37931 | 1.43381 | 1.37931 | 1.43381 |
|                  | $\alpha$ | 121.305 | 118.039 | 121.305 | 118.039 |
|                  | $\alpha$ | 121.058 | 121.791 | 121.058 | 121.791 |
|                  | $\alpha$ | 118.246 | 121.791 | 118.246 | 121.791 |
|                  | $\alpha$ | 120.087 | 118.039 | 120.087 | 118.039 |
|                  | $\alpha$ | 118.246 | 120.17  | 118.246 | 120.17  |
|                  | $\alpha$ | 121.058 | 120.17  | 121.058 | 120.17  |
|                  | C-H      | 1.0829  | 1.08292 | 1.0829  | 1.08292 |
|                  | C-H      | 1.08231 | 1.08292 | 1.08231 | 1.08292 |
|                  | C-H      | 1.08231 |         | 1.08231 |         |
|                  | $\beta$  | 119.348 | 120.904 | 119.348 | 120.904 |
|                  | $\beta$  | 118.414 | 117.306 | 118.414 | 117.306 |
|                  | $\beta$  | 120.528 |         | 120.528 |         |

Table 7: C=C and C-H distances, and angles in triangle nano-islands

|                  | <b>n</b> | <b>2</b> |         |         | <b>3</b> |         |         | <b>4</b> |         |         |
|------------------|----------|----------|---------|---------|----------|---------|---------|----------|---------|---------|
| Central hexagons | C=C      |          |         |         |          |         |         | 1.41058  |         |         |
|                  | C=C      |          |         |         |          |         |         | 1.41058  |         |         |
|                  | C=C      |          |         |         |          |         |         | 1.41058  |         |         |
|                  | C=C      |          |         |         |          |         |         | 1.41058  |         |         |
|                  | C=C      |          |         |         |          |         |         | 1.41058  |         |         |
|                  | C=C      |          |         |         |          |         |         | 1.41058  |         |         |
|                  | $\alpha$ |          |         |         |          |         |         | 119.88   |         |         |
|                  | $\alpha$ |          |         |         |          |         |         | 120.12   |         |         |
|                  | $\alpha$ |          |         |         |          |         |         | 119.88   |         |         |
|                  | $\alpha$ |          |         |         |          |         |         | 120.12   |         |         |
| Apical hexagons  | C=C      | 1.38245  | 1.38245 | 1.38245 | 1.38215  | 1.38215 | 1.38215 | 1.38372  | 1.38372 | 1.38372 |
|                  | C=C      | 1.41576  | 1.41576 | 1.41576 | 1.41815  | 1.41815 | 1.41815 | 1.40279  | 1.40279 | 1.40279 |
|                  | C=C      | 1.42545  | 1.42545 | 1.42545 | 1.42819  | 1.42819 | 1.42819 | 1.4161   | 1.4161  | 1.4161  |
|                  | C=C      | 1.42545  | 1.42545 | 1.42545 | 1.42819  | 1.42819 | 1.42819 | 1.4161   | 1.4161  | 1.4161  |
|                  | C=C      | 1.41576  | 1.41576 | 1.41576 | 1.41815  | 1.41815 | 1.41815 | 1.40279  | 1.40279 | 1.40279 |
|                  | C=C      | 1.38245  | 1.38245 | 1.38245 | 1.38215  | 1.38215 | 1.38215 | 1.38372  | 1.38372 | 1.38372 |
|                  | $\alpha$ | 120.928  | 120.928 | 120.928 | 120.981  | 120.981 | 120.981 | 120.544  | 120.544 | 120.544 |
|                  | $\alpha$ | 120.818  | 120.818 | 120.818 | 120.895  | 120.895 | 120.895 | 120.711  | 120.711 | 120.711 |
|                  | $\alpha$ | 118.718  | 118.718 | 118.718 | 118.589  | 118.589 | 118.589 | 119.075  | 119.075 | 119.075 |
|                  | $\alpha$ | 120      | 120     | 120     | 120.049  | 120.049 | 120.049 | 119.885  | 119.885 | 119.885 |
|                  | $\alpha$ | 118.718  | 118.718 | 118.718 | 118.589  | 118.589 | 118.589 | 119.075  | 119.075 | 119.075 |
|                  | $\alpha$ | 120.818  | 120.818 | 120.818 | 120.895  | 120.895 | 120.895 | 120.711  | 120.711 | 120.711 |
|                  | C-H      | 1.08278  | 1.08278 | 1.08278 | 1.08278  | 1.08278 | 1.08278 | 1.08269  | 1.08269 | 1.08269 |
|                  | C-H      | 1.08242  | 1.08242 | 1.08242 | 1.08237  | 1.08237 | 1.08237 | 1.08238  | 1.08238 | 1.08238 |
|                  | C-H      | 1.08242  | 1.08242 | 1.08242 | 1.08237  | 1.08237 | 1.08237 | 1.08238  | 1.08238 | 1.08238 |
|                  | $\beta$  | 119.536  | 119.536 | 119.536 | 119.509  | 119.509 | 119.509 | 119.728  | 119.728 | 119.728 |
|                  | $\beta$  | 118.968  | 118.968 | 118.968 | 118.883  | 118.883 | 118.883 | 119.174  | 119.174 | 119.174 |
|                  | $\beta$  | 120.214  | 120.214 | 120.214 | 120.221  | 120.221 | 120.221 | 120.115  | 120.115 | 120.115 |



Table 8: C=C and C-H distances, and angles in triangle nano-islands - Part2

|                  | <b>n</b> | <b>5</b> |         |         | <b>6</b> |         |         | <b>7</b> |         |         |
|------------------|----------|----------|---------|---------|----------|---------|---------|----------|---------|---------|
| Central hexagons | C=C      | 1.41308  | 1.42345 | 1.42596 | 1.42446  | 1.41999 | 1.42167 | 1.41189  |         |         |
|                  | C=C      | 1.42345  | 1.41308 | 1.42596 | 1.42167  | 1.41999 | 1.42446 | 1.41189  |         |         |
|                  | C=C      | 1.42596  | 1.41308 | 1.42345 | 1.42167  | 1.42446 | 1.41999 | 1.41189  |         |         |
|                  | C=C      | 1.42596  | 1.42345 | 1.41308 | 1.42446  | 1.42617 | 1.41999 | 1.41189  |         |         |
|                  | C=C      | 1.42345  | 1.42596 | 1.41308 | 1.41999  | 1.42617 | 1.42446 | 1.41189  |         |         |
|                  | C=C      | 1.41308  | 1.42596 | 1.42345 | 1.41999  | 1.42446 | 1.42167 | 1.41189  |         |         |
|                  | $\alpha$ | 120.31   | 119.628 | 119.628 | 119.894  | 119.894 | 120     | 119.822  |         |         |
|                  | $\alpha$ | 120.217  | 120.217 | 120     | 119.996  | 120.22  | 119.996 | 120.178  |         |         |
|                  | $\alpha$ | 119.628  | 120.31  | 119.628 | 120      | 119.894 | 119.894 | 119.822  |         |         |
|                  | $\alpha$ | 120      | 120.217 | 120.217 | 119.996  | 119.996 | 120.22  | 120.178  |         |         |
|                  | $\alpha$ | 119.628  | 119.628 | 120.31  | 119.894  | 120     | 119.894 | 119.822  |         |         |
|                  | $\alpha$ | 120.217  | 120     | 120.217 | 120.22   | 119.996 | 119.996 | 120.178  |         |         |
| Apical hexagons  | C=C      | 1.38396  | 1.38396 | 1.38396 | 1.3833   | 1.3833  | 1.3833  | 1.38438  | 1.38438 | 1.38438 |
|                  | C=C      | 1.40091  | 1.40091 | 1.40091 | 1.40786  | 1.40786 | 1.40786 | 1.39841  | 1.39841 | 1.39841 |
|                  | C=C      | 1.4169   | 1.4169  | 1.4169  | 1.42268  | 1.42268 | 1.42268 | 1.41454  | 1.41454 | 1.41454 |
|                  | C=C      | 1.4169   | 1.4169  | 1.4169  | 1.42268  | 1.42268 | 1.42268 | 1.41454  | 1.41454 | 1.41454 |
|                  | C=C      | 1.40091  | 1.40091 | 1.40091 | 1.40786  | 1.40786 | 1.40786 | 1.39841  | 1.39841 | 1.39841 |
|                  | C=C      | 1.38396  | 1.38396 | 1.38396 | 1.3833   | 1.3833  | 1.3833  | 1.38438  | 1.38438 | 1.38438 |
|                  | $\alpha$ | 120.554  | 120.554 | 120.554 | 120.768  | 120.768 | 120.768 | 120.522  | 120.522 | 120.522 |
|                  | $\alpha$ | 120.675  | 120.675 | 120.675 | 120.79   | 120.79  | 120.79  | 120.621  | 120.621 | 120.621 |
|                  | $\alpha$ | 119.203  | 119.203 | 119.203 | 118.878  | 118.878 | 118.878 | 119.237  | 119.237 | 119.237 |
|                  | $\alpha$ | 119.69   | 119.69  | 119.69  | 119.897  | 119.897 | 119.897 | 119.763  | 119.763 | 119.763 |
|                  | $\alpha$ | 119.203  | 119.203 | 119.203 | 118.878  | 118.878 | 118.878 | 119.237  | 119.237 | 119.237 |
|                  | $\alpha$ | 120.675  | 120.675 | 120.675 | 120.79   | 120.79  | 120.79  | 120.621  | 120.621 | 120.621 |
|                  | C-H      | 1.08273  | 1.08273 | 1.08273 | 1.08274  | 1.08274 | 1.08274 | 1.08274  | 1.08274 | 1.08274 |
|                  | C-H      | 1.08237  | 1.08237 | 1.08237 | 1.0824   | 1.0824  | 1.0824  | 1.08237  | 1.08237 | 1.08237 |
|                  | C-H      | 1.08237  | 1.08237 | 1.08237 | 1.0824   | 1.0824  | 1.0824  | 1.08237  | 1.08237 | 1.08237 |
|                  | $\beta$  | 119.723  | 119.723 | 119.723 | 119.616  | 119.616 | 119.616 | 119.739  | 119.739 | 119.739 |
|                  | $\beta$  | 119.208  | 119.208 | 119.208 | 119.072  | 119.072 | 119.072 | 119.284  | 119.284 | 119.284 |
|                  | $\beta$  | 120.117  | 120.117 | 120.117 | 120.138  | 120.138 | 120.138 | 120.095  | 120.095 | 120.095 |

Table 9: Basis set effects for the smallest edifices (energies in hartree at the STO-3G optimized geometry)

|     | STO-3G       | ANO <sub>VDZ</sub> | ANO <sub>VTZ</sub> | ANO <sub>VQZ</sub> |
|-----|--------------|--------------------|--------------------|--------------------|
| H_2 | -904.822707  | -916.150544        | -916.262871        | -916.275288        |
|     | -905.074409  | -916.513558        | -916.660075        | -916.683710        |
| R_3 | -1129.094416 | -1143.502335       | -1143.637361       | -1143.654838       |
|     | -1129.412242 | -1143.940113       | -1144.119948       | -                  |
| T_3 | -829.887993  | -840.301482        | -840.404356        | -840.415641        |
|     | -830.135220  | -840.649106        | -840.782867        | -840.804340        |

ANO<sub>VDZ</sub>: (3s3p1d) / ANO<sub>VTZ</sub>: (4s3p2d1f) / ANO<sub>VQZ</sub>: (5s4p3d2f)

Table 10: Active space size effect on NEVPT2 energies (in hartree)

|     | Min.         | Min. + 2 orbitals | Min. + 4 orbitals |
|-----|--------------|-------------------|-------------------|
| R_4 | -1806.692777 | -1806.692039      | -1806.688307      |
| T_3 | -830.135221  | -830.135218       | -830.129385       |
